# Supplementary material
Source: ML conference proceedings conference paper supplement (https://openaccess.thecvf.com/content/CVPR_2019/html/Feng_Unsupervised_Image_Captioning_CVPR_2019_paper.html)
Supplement: Supplementary file 1 [file Feng_Unsupervised_Image_Captioning_CVPR_2019_supplemental.pdf]

### 3. More Qualitative Results

More qualitative results are illustrated in Fig. 4. The caption generated by “con2sen” only depends on the detected objects in the input image, while the other models generate captions conditioning on the input image feature. For the first image, the sentence generated by “adv” is unrelated to the image because the adversarial objective only enforces the sentence to be genuine. After introducing the other objectives, the generated caption is more closely related to the image. “Ours w/o init” generates “helmet”, which does not appear in the image. The caption generated by “Ours” accurately describes the image content.

Fig. 5 illustrates some failure cases. In the first case, only “adv + con” recognizes that it is a “hotel” room. Most of the other models regard it as a “bedroom”. The errors in the following two cases are similar. The proposed model fails to recognize the relative position of the objects in the images and generates erroneous captions.

|                                                                                     |                   |                                                                                              |
|-------------------------------------------------------------------------------------|-------------------|----------------------------------------------------------------------------------------------|
| 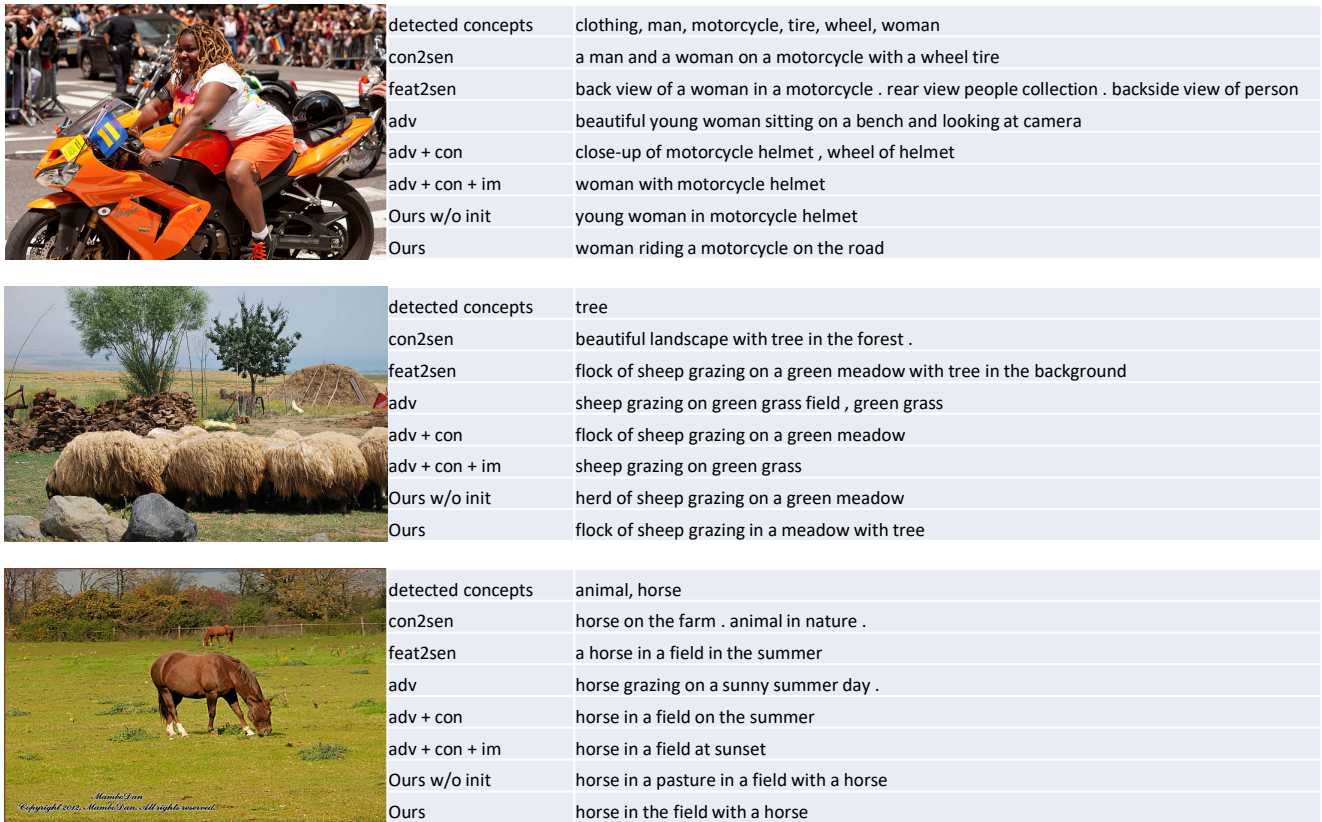   | detected concepts | clothing, man, motorcycle, tire, wheel, woman                                                |
|                                                                                     | con2sen           | a man and a woman on a motorcycle with a wheel tire                                          |
|                                                                                     | feat2sen          | back view of a woman in a motorcycle . rear view people collection . backside view of person |
|                                                                                     | adv               | beautiful young woman sitting on a bench and looking at camera                               |
|                                                                                     | adv + con         | close-up of motorcycle helmet , wheel of helmet                                              |
|                                                                                     | adv + con + im    | woman with motorcycle helmet                                                                 |
|                                                                                     | Ours w/o init     | young woman in motorcycle helmet                                                             |
|                                                                                     | Ours              | woman riding a motorcycle on the road                                                        |
|   | detected concepts | tree                                                                                         |
|                                                                                     | con2sen           | beautiful landscape with tree in the forest .                                                |
|                                                                                     | feat2sen          | flock of sheep grazing on a green meadow with tree in the background                         |
|                                                                                     | adv               | sheep grazing on green grass field , green grass                                             |
|                                                                                     | adv + con         | flock of sheep grazing on a green meadow                                                     |
|                                                                                     | adv + con + im    | sheep grazing on green grass                                                                 |
|                                                                                     | Ours w/o init     | herd of sheep grazing on a green meadow                                                      |
|                                                                                     | Ours              | flock of sheep grazing in a meadow with tree                                                 |
|  | detected concepts | animal, horse                                                                                |
|                                                                                     | con2sen           | horse on the farm . animal in nature .                                                       |
|                                                                                     | feat2sen          | a horse in a field in the summer                                                             |
|                                                                                     | adv               | horse grazing on a sunny summer day .                                                        |
|                                                                                     | adv + con         | horse in a field on the summer                                                               |
|                                                                                     | adv + con + im    | horse in a field at sunset                                                                   |
|                                                                                     | Ours w/o init     | horse in a pasture in a field with a horse                                                   |
|                                                                                     | Ours              | horse in the field with a horse                                                              |

Figure 4. More qualitative results by the unsupervised captioning models trained with different objectives.

|                                                                                     |                   |                                                                                         |
|-------------------------------------------------------------------------------------|-------------------|-----------------------------------------------------------------------------------------|
| 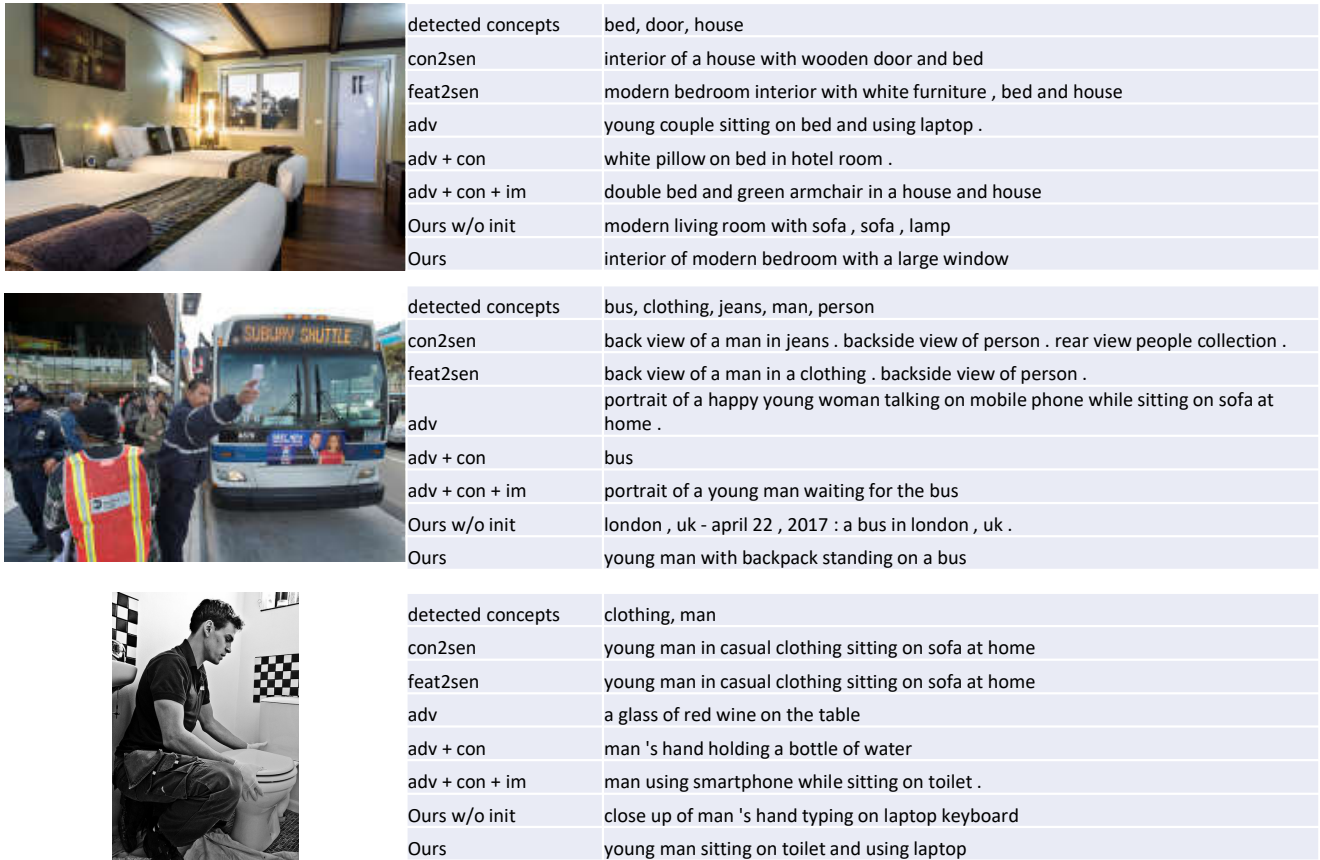   | detected concepts | bed, door, house                                                                        |
|                                                                                     | con2sen           | interior of a house with wooden door and bed                                            |
|                                                                                     | feat2sen          | modern bedroom interior with white furniture , bed and house                            |
|                                                                                     | adv               | young couple sitting on bed and using laptop .                                          |
|                                                                                     | adv + con         | white pillow on bed in hotel room .                                                     |
|                                                                                     | adv + con + im    | double bed and green armchair in a house and house                                      |
|                                                                                     | Ours w/o init     | modern living room with sofa , sofa , lamp                                              |
|                                                                                     | Ours              | interior of modern bedroom with a large window                                          |
|   | detected concepts | bus, clothing, jeans, man, person                                                       |
|                                                                                     | con2sen           | back view of a man in jeans . backside view of person . rear view people collection .   |
|                                                                                     | feat2sen          | back view of a man in a clothing . backside view of person .                            |
|                                                                                     | adv               | portrait of a happy young woman talking on mobile phone while sitting on sofa at home . |
|                                                                                     | adv + con         | bus                                                                                     |
|                                                                                     | adv + con + im    | portrait of a young man waiting for the bus                                             |
|                                                                                     | Ours w/o init     | london , uk - april 22 , 2017 : a bus in london , uk .                                  |
|                                                                                     | Ours              | young man with backpack standing on a bus                                               |
|  | detected concepts | clothing, man                                                                           |
|                                                                                     | con2sen           | young man in casual clothing sitting on sofa at home                                    |
|                                                                                     | feat2sen          | young man in casual clothing sitting on sofa at home                                    |
|                                                                                     | adv               | a glass of red wine on the table                                                        |
|                                                                                     | adv + con         | man 's hand holding a bottle of water                                                   |
|                                                                                     | adv + con + im    | man using smartphone while sitting on toilet .                                          |
|                                                                                     | Ours w/o init     | close up of man 's hand typing on laptop keyboard                                       |
|                                                                                     | Ours              | young man sitting on toilet and using laptop                                            |

Figure 5. The failure cases by the unsupervised captioning models trained with different objectives.
